# Supplementary material
Source: ML conference proceedings conference paper supplement (https://proceedings.mlr.press/v164/roh22a.html)
Supplement: Supplementary file 1 [file roh22a-supp.zip]

Archive with 1 entries (1 files):
- language-refer-supp.pdf
